# Supplementary material for: Rhizospheric Organic Acids as Biostimulants: Monitoring Feedbacks on Soil Microorganisms and Biochemical Properties
Source: Front Plant Sci. 2020 May 28;11:633. doi: 10.3389/fpls.2020.00633 (PMC7270406; doi:10.3389/fpls.2020.00633)
Supplement: Supplementary file 2 [file Table_1.XLSX]

## Sheet: Relative abundance for all taxa
Supplementary Table 1. Relative abundance for all taxa among samples.
Taxonomic Categories					Samples
					Control		Lactic Acid		Citric Acid		Oxalic Acid
Phylum	Class	Order	Family	Genus	7 days	28 days	7 days	28 days	7 days	28 days	7 days	28 days
Acidobacteria	Acidobacteria-6	iii1-15	RB40	Unidentified	0.0366256	0	0	0	0	0	0.024417	0.0122085
			mb2424	Unidentified	0.805762	0.366256	0.231962	0.390673	0.0976682	0.341839	0.610426	0.134294
			Unidentified		3.78464	3.24747	0.805762	1.4284	0.671469	1.7214	2.45391	1.73361
		Unidentified			0.32963	0.354047	0.0854597	0.183128	0.0854597	0.122085	0.134294	0.158711
	Acidobacteriia	Acidobacteriales	Koribacteraceae	Candidatus Koribacter	0.0122085	0.024417	0	0.0854597	0	0.0488341	0	0.0610426
				Unidentified	0	0	0	0.0122085	0	0	0	0
	Solibacteres	Solibacterales	Solibacteraceae	Candidatus Solibacter	0.0366256	0.0366256	0	0	0	0.0122085	0.0122085	0.024417
			Unidentified		2.47833	2.40508	0.65926	1.59932	0.402881	1.79465	1.35515	2.576
	Sva0725	Sva0725	Unidentified		0.0610426	0.0122085	0.0122085	0.024417	0	0	0.024417	0
	[Chloracidobacteria]	11-24	Unidentified		0.0122085	0	0.024417	0.024417	0	0	0.024417	0
		DS-100	Unidentified		0.0854597	0.0854597	0.024417	0.0366256	0	0.0366256	0.0610426	0.0976682
		PK29	Unidentified		0.0488341	0.024417	0	0	0.0122085	0	0.0122085	0.0122085
		RB41	Ellin6075	Unidentified	2.1487	0.366256	0.537175	0.65926	0.402881	1.08656	1.35515	0.293005
			Unidentified		0.976682	0.549383	0.231962	0.378464	0.134294	0.366256	0.74472	0.439507
	iii1-8	DS-18	Unidentified		0.0732511	0.0366256	0.0122085	0.158711	0.0122085	0.158711	0.0854597	0.402881
Actinobacteria	Acidimicrobiia	Acidimicrobiales	AKIW874	Unidentified	0.195336	0.0122085	0.0732511	0.0488341	0	0.024417	0.0610426	0.0366256
			C111	Unidentified	0.354047	0.463924	0.109877	0.293005	0.0732511	0.268587	0.256379	0.402881
			EB1017	Unidentified	0.024417	0.0732511	0	0.0366256	0.024417	0.0122085	0.0122085	0
			Iamiaceae	Iamia	0.024417	0.0854597	0.0122085	0.024417	0.0122085	0.024417	0.024417	0.024417
			Unidentified		0.207545	0.207545	0.0854596	0.158711	0.0610426	0.0610426	0.0854596	0.109877
	Actinobacteria	Actinomycetales	Actinosynnemataceae	Unidentified	0	0.024417	0	0	0	0	0.0122085	0
			Bogoriellaceae	Georgenia	0	0	0.0122085	0.0610426	0	0.561592	0	0
			Cellulomonadaceae	Actinotalea	0	0	0	0.024417	0.0122085	0.170919	0	0
				Cellulomonas	0.0366256	0.0122085	0	0	0.024417	0.0122085	0.0366256	0.0122085
			Geodermatophilaceae	Geodermatophilus	0.219753	0.219753	0.207545	0.24417	0.061043	0.183128	0.183128	0.183128
				Modestobacter	0.0366256	0.0732511	0.0610426	0.0122085	0.024417	0.024417	0.0732511	0.024417
				Unidentified	1.08656	1.08656	0.634843	0.65926	0.524966	0.488341	0.879014	1.09877
			Glycomycetaceae	Glycomyces	0.024417	0.0122085	0.0122085	0.0122085	0	0	0	0.024417
			Intrasporangiaceae	Phycicoccus	0.0488341	0.0610426	0.0488341	0.0610426	0.024417	0.0610426	0.0366256	0.024417
				Unidentified	0.0976682	0.0366256	0.195336	5.79905	0.0366256	2.88121	0.024417	0.0488341
			Kineosporiaceae	Unidentified	0.0610426	0.024417	0.024417	0.0122085	0.0122085	0	0.024417	0.0366256
			Microbacteriaceae	Agromyces	0.219753	0.146502	1.97778	3.58931	0.720303	1.30631	0.207545	0.122085
				Microbacterium	0	0.0366256	0.0976682	0.207545	0.024417	0.0488341	0.024417	0
				Unidentified	0.0732511	0.0732511	0.0732511	0.195336	0.0854597	0.0610426	0.0732511	0.0732511
			Micrococcaceae	Arthrobacter	0.0122085	0	0.0122085	0	0	0.0122085	0	0.0122085
				Unidentified	3.50385	3.40618	20.4126	8.91222	12.9654	6.7391	1.68478	1.55048
			Micromonosporaceae	Actinoplanes	0.122085	0.0366256	0.0122085	0	0	0.0122085	0.0732511	0.0366256
				Dactylosporangium	0	0.0366256	0.0122085	0	0.0122085	0	0.0366256	0.0122085
				Virgisporangium	0.0854597	0.0488341	0.0488341	0	0	0	0.0488341	0.0488341
				Unidentified	0.268587	0.354047	0.0976682	0.0854596	0.024417	0.0122085	0.146502	0.109877
			Mycobacteriaceae	Mycobacterium	0.207545	0.195336	0.0366256	0.134294	0.0488341	0.0488341	0.0854597	0.0976682
			Nocardiaceae	Nocardia	0.024417	0	0.0122085	0	0	0.0122085	0	0.024417
				Rhodococcus	0.158711	0.146502	0.134294	0.097668	0.012209	0.073251	0.061043	0.08546
			Nocardioidaceae	Aeromicrobium	0.0122085	0.0366256	0	0.0122085	0.0122085	0	0.0122085	0.024417
				Kribbella	0.0122085	0.0488341	0.0488341	0.0732511	0.0122085	0.024417	0.0610426	0.0610426
				Nocardioides	0.0976682	0.0976682	0.109877	0.0854597	0.109877	0.0488341	0.024417	0.0976682
				Unidentified	0.537175	1.33073	0.451715	0.586009	0.207545	0.817971	0.366256	1.15981
			Promicromonosporaceae	Promicromonospora	0.0610426	0.0122085	0.146502	0.0122085	0.0366256	0.0122085	0.0854597	0.024417
			Propionibacteriaceae	Unidentified	0.207545	0.170919	0.0122085	0.0366256	0.0366256	0.0610426	0.0854597	0.0610426
			Pseudonocardiaceae	Actinomycetospora	0.0366256	0.024417	0	0.0122085	0	0.0122085	0.0366256	0
				Pseudonocardia	0.256379	0.231962	0.24417	0.109877	0.0732511	0.109877	0.195336	0.354047
				Unidentified	0.0122085	0.0488341	0.0366256	0.0122085	0	0	0.0122085	0.024417
			Sporichthyaceae	Unidentified	0.024417	0	0	0	0	0	0	0
			Streptomycetaceae	Streptomyces	0.231962	0.390673	0.24417	0.122085	0.122085	0.08546	0.207545	0.170919
				Unidentified	0.65926	0.634843	0.451715	0.256379	0.341839	0.158711	0.512758	0.549384
			Streptosporangiaceae	Nonomuraea	0.024417	0.109877	0.024417	0.0122085	0	0.024417	0.0122085	0.0366256
				Unidentified	0	0.0366256	0.0366256	0.0366255	0.0122085	0	0.0732511	0.0366256
			Thermomonosporaceae	Actinomadura	0	0.0122085	0	0.0366256	0	0	0	0.0122085
			Unidentified		0.549384	0.439507	0.219753	0.305213	0.170919	0.158711	0.293005	0.32963
		Micrococcales	Unidentified		0.146502	0.0976682	0.109877	0.0488341	0.0122085	0.0610426	0.0732511	0.0366256
		Unidentified			0	0.0122085	0	0	0	0.0122085	0	0
	MB-A2-108	0319-7L14	Unidentified		0.317422	0.390673	0.158711	0.134294	0.0854597	0.0854597	0.158711	0.207545
	Nitriliruptoria	Euzebyales	Euzebyaceae	Euzebya	0.0488341	0.0122085	0.024417	0.0122085	0.0122085	0	0.0366256	0.0122085
	Rubrobacteria	Rubrobacterales	Rubrobacteraceae	Rubrobacter	5.05433	5.45721	1.89232	2.11207	1.36735	1.68478	3.02771	3.05213
				Unidentified	0.195336	0.41509	0.122085	0.207545	0.0854597	0.0976682	0.134294	0.183128
	Thermoleophilia	Gaiellales	Gaiellaceae	Unidentified	1.5749	2.576	0.561592	0.879014	0.354047	0.610426	1.17202	1.68478
			Unidentified		0.024417	0.0366256	0	0	0	0	0.0122085	0.0122085
		Solirubrobacterales	Conexibacteraceae	Unidentified	0.0976682	0.0610426	0.0488341	0.0122085	0.0122085	0.024417	0.0610426	0.024417
			Patulibacteraceae	Unidentified	0	0.0122085	0.0122085	0.0122085	0	0.024417	0.0122085	0.0122085
			Solirubrobacteraceae	Unidentified	0.24417	0.305213	0.122085	0.207545	0.0976682	0.146502	0.256379	0.207545
			Unidentified		0.940056	1.13539	0.622635	0.476132	0.158711	0.390673	0.781345	0.854596
	Unidentified				0.0854597	0.0122085	0.0366256	0.0488341	0.024417	0.0122085	0.0610426	0.024417
Armatimonadetes	[Fimbriimonadia]	[Fimbriimonadales]	[Fimbriimonadaceae]	Fimbriimonas	0.0122085	0	0	0	0	0	0	0
Bacteroidetes	Cytophagia	Cytophagales	Cytophagaceae	Adhaeribacter	0.74472	0.927848	0.463924	0.24417	0.268587	0.293005	0.500549	0.488341
				Dyadobacter	0	0	0	0	0	0.0122085	0	0
				Pontibacter	0.231962	0.0854597	0.0976682	0	0.0122085	0.0488341	0.0488341	0.024417
				Rhodocytophaga	0.024417	0.0610426	0.0366256	0.0122085	0.024417	0.0366256	0.024417	0.024417
				Unidentified	0.317422	0.219753	0.219753	0.207545	0.0732511	0.0610426	0.268587	0.134294
	Sphingobacteriia	Sphingobacteriales	Sphingobacteriaceae	Unidentified	0.0366256	0.0366255	0.146502	0.122085	0.231962	0.280796	0.0610426	0.024417
	[Saprospirae]	[Saprospirales]	Chitinophagaceae	Flavisolibacter	4.51715	2.62483	0.708094	3.93114	2.13649	6.48272	5.07874	3.1498
				Unidentified	0.586009	0.671469	0.146502	0.634843	0.268587	0.74472	0.549384	0.74472
			Saprospiraceae	Unidentified	0.0732511	0.122085	0	0	0	0.0122085	0.024417	0.0854597
Chlorobi	OPB56	Unidentified			0.207545	0.268587	0.0488341	0.32963	0.024417	0.256379	0.0854597	0.231962
	Unidentified				0.0610426	0.0732511	0.0122085	0.122085	0	0.268587	0.0488341	0.268587
Chloroflexi	Anaerolineae	Anaerolineales	Anaerolinaceae	Anaerolinea	0	0	0	0.500549	0	1.03772	0.0122085	0.024417
		Ardenscatenales	Ardenscatenaceae	Ardenscatena	0.0610426	0.134294	0	0.134294	0.0122085	0.109877	0.0366256	0.0976682
		Caldilineales	Caldilineaceae	Caldilinea	0.0610426	0.0366256	0.0366256	0.0488341	0	0.0488341	0.024417	0.0488341
				Unidentified	0.134294	0.183128	0.0488341	0.146502	0.0122085	0.146502	0.0488341	0.0732511
		H39	Unidentified		0.0732511	0.170919	0.0122085	0.0732511	0.024417	0.024417	0.0854597	0.195336
		SBR1031	A4b	Unidentified	0.0732511	0.0122085	0.0366256	0.0732511	0.024417	0.231962	0.0366256	0.109877
		envOPS12	Unidentified		0.32963	0.720303	0.0732511	0.195336	0.0610426	0.32963	0.195336	0.708094
	C0119	Unidentified			0.231962	0.927848	0.0976682	0.146502	0.0122085	0.219753	0.219753	1.09877
	Chloroflexi	AKIW781	Unidentified		0.293005	0.24417	0.122085	0.256379	0.0732511	0.293005	0.134294	0.122085
		Chloroflexales	Unidentified		0.0610426	0.0122085	0	0.024417	0.0122085	0.0366256	0.024417	0.0854597
		Herpetosiphonales	Unidentified		0.0610426	0.0732511	0	0	0	0.0488341	0.024417	0.0854597
		[Roseiflexales]	[Kouleothrixaceae]	Unidentified	0.0610426	0.0610426	0	0.0122085	0.0366256	0.024417	0.0976682	0.0488341
			Unidentified		0.024417	0.024417	0.0122085	0.0488341	0.0122085	0.0122085	0.0488341	0.0122085
		Unidentified			0	0.0122085	0	0.024417	0.0366256	0.0488341	0.024417	0.0122085
	Ellin6529	Unidentified			0.524966	0.903431	0.231962	0.268587	0.0488341	0.32963	0.305213	0.647052
	Gitt-GS-136	Unidentified			0.341839	0.427298	0.0976682	0.134294	0.0488341	0.146502	0.158711	0.341839
	S085	Unidentified			0.146502	0.183128	0.0366256	0.0732511	0	0.0610426	0.0610426	0.0976682
	SAR202	Unidentified			0.0122085	0.024417	0	0	0	0	0	0.0122085
	TK10	AKYG885	5B-12	Unidentified	0	0.0122085	0	0.0122085	0.0122085	0.0122085	0.024417	0
		AKYG885	Dolo_23	Unidentified	0.146502	0.146502	0.0488341	0.0366256	0	0.0610426	0.0488341	0.0976682
		B07_WMSP1	Unidentified		0.0976682	0.170919	0.0610426	0.0610426	0.024417	0.0610426	0.0976682	0.0976682
		Unidentified			0.170919	0.268588	0.0976682	0.109877	0.0366256	0.0854597	0.158711	0.109877
	TK17	mle1-48	Unidentified		0.0732511	0.268587	0	0.0976682	0.0122085	0.024417	0.0122085	0.183128
	Thermomicrobia	AKYG1722	Unidentified		0.158711	0.207545	0.0488341	0.122085	0.0610426	0.219753	0.134294	0.134294
		JG30-KF-CM45	Unidentified		2.20974	2.77133	0.98889	3.1498	0.647052	2.83238	1.24527	2.08766
		Unidentified			0.0122085	0	0	0.0122085	0	0	0	0.0122085
	Unidentified				0.0488341	0.0732511	0.0366255	0.0366256	0	0.0122085	0.024417	0.0122085
Cyanobacteria	Chloroplast	Chlorophyta	Unidentified		0.0122085	0.0122085	0	0	0	0.0122085	0.0122085	0.0122085
		Stramenopiles	Unidentified		0.0122085	0	0	0	0	0.0122085	0	0.0122085
	Nostocophycideae	Nostocales	Nostocaceae	Unidentified	0	0.024417	0	0.0122085	0.0122085	0.0122085	0.0122085	0.0122085
Firmicutes	Bacilli	Bacillales	Alicyclobacillaceae	Alicyclobacillus	0.024417	0.0610426	0.024417	0.0122085	0.024417	0.024417	0.0732511	0.0976682
			Bacillaceae	Bacillus	1.35515	2.0022	10.2185	1.25748	2.02662	0.756928	0.927848	0.940056
				Unidentified	0.170919	0.219753	0.305213	0.0732511	0.0366256	0.0488341	0.0976682	0.146502
			Paenibacillaceae	Ammoniphilus	0.122085	0.146502	0.0366256	0.0366256	0.146502	0.0732511	0.195336	0.146502
				Cohnella	0.0122085	0.024417	0	0	0	0	0	0
				Paenibacillus	0.048834	0.097668	0.024417	0.024417	0.024417	0	0.0122085	0.024417
				Unidentified	0	0	0.0122085	0	0	0	0.024417	0
			Planococcaceae	Lysinibacillus	0.0122085	0.0488341	0	0.0122085	0.0366256	0.0122085	0.0122085	0.0366256
				Paenisporosarcina	0.0122085	0	0	0	0	0	0	0
				Solibacillus	0	0	0	0	0	0	0	0.0122085
				Unidentified	0	0.0122085	0.0122085	0.0122085	0.024417	0.024417	0	0
			Thermoactinomycetaceae	Shimazuella	0.0122085	0.0366256	0.0122085	0	0	0.0122085	0	0.0122085
			Unidentified		4.08985	4.65145	11.3051	4.0166	5.04212	2.02661	2.38066	2.22195
	Clostridia	Clostridiales	Clostridiaceae	Caloramator	0	0	0.817971	0.146502	0.293005	0.0610426	0	0
				Clostridium	0.024417	0.024417	0.805763	0.195336	2.25858	0.402881	0.0122085	0.024417
				Unidentified	0.0366256	0.0122085	0.109877	0.0366256	35.8076	9.24185	0	0
			Gracilibacteraceae	Unidentified	0.0122085	0	0	0	0.0976682	0	0	0
				Gracilibacter	0	0	0.0488341	0.0488341	0.0122085	0.0854597	0	0
			Peptococcaceae	Desulfosporosinus	0	0	0.268587	0	0.341839	0.0122085	0	0
			Peptostreptococcaceae	Tepidibacter	0	0.0610426	0.024417	0.0122085	0.0610426	0.0488341	0.0366256	0
			Veillonellaceae	Pelosinus	0	0.0122085	10.1331	0.0732511	1.44061	0.0366256	0	0
				Sporomusa	0	0	0.0488341	0	0.0854597	0.0122085	0	0
				Unidentified	0	0	0	0.109877	0.0488341	0.354047	0	0
			[Tissierellaceae]	Sedimentibacter	0	0	0.390673	0.256379	4.50494	1.5749	0	0
			Unidentified		0	0	0.0122085	0.195336	0	0.122085	0	0
Gemmatimonadetes	Gemm-1	Unidentified			1.5749	2.17312	0.598218	0.781345	0.366256	0.879014	0.98889	1.45281
	Gemm-3	Unidentified			0.708094	0.708094	0.0976682	0.32963	0.0976682	0.256379	0.341839	0.41509
	Gemm-5	Unidentified			0.708094	0.561592	0.0854597	0.134294	0.109877	0.183128	0.41509	0.683677
	Gemmatimonadetes	Gemmatimonadales	Ellin5301	Unidentified	0.402881	0.354047	0.0732511	0.183128	0.024417	0.109877	0.183128	0.24417
			Gemmatimonadaceae	Gemmatimonas	0.0122085	0.0122085	0.0122085	0	0.0122085	0	0.024417	0.0122085
			Unidentified		0.0122085	0.024417	0	0	0	0	0.0122085	0.0122085
		KD8-87	Unidentified		0	0.0122085	0.024417	0	0	0	0.024417	0.0122085
		N1423WL	Unidentified		0.219753	0.524966	0.0610426	0.0610426	0.024417	0.0488341	0.207545	0.183128
		Unidentified			1.12318	0.805763	0.219753	0.402881	0.146502	0.195336	0.817971	1.12318
Nitrospirae	Nitrospira	Nitrospirales	0319-6A21	Unidentified	0.0122085	0.0366256	0.024417	0	0.0122085	0.0122085	0.024417	0
			Nitrospiraceae	Nitrospira	0.317422	0.378464	0.122085	0.0366256	0.0122085	0.109877	0.146502	0.32963
				Unidentified	0.170919	0.0854597	0.024417	0.0122085	0.024417	0.0488341	0.0976682	0.0122085
Planctomycetes	Phycisphaerae	Phycisphaerales	Unidentified		0	0.0122085	0	0.024417	0	0	0	0.0122085
		WD2101	Unidentified		1.55048	1.50165	0.647052	1.15981	0.207545	0.598218	0.842388	0.891222
	Planctomycetia	B97	Unidentified		0.293005	0.488341	0.0122085	0.109877	0.0122085	0.146502	0.0854597	0.280796
		Gemmatales	Gemmataceae	Gemmata	0.390673	1.02552	0.195336	0.74472	0.0610426	0.500549	0.24417	1.13539
				Unidentified	0.0732511	0.0366255	0.024417	0.0610426	0	0.0366256	0.024417	0.0610426
			Isosphaeraceae	Unidentified	0.134294	0.0488341	0.0366256	0.0366256	0.0610426	0.0366256	0.0488341	0.0366256
		Pirellulales	Pirellulaceae	A17	0.024417	0.024417	0	0	0.0366256	0	0.024417	0.0122085
				Pirellula	0.024417	0.0610426	0	0	0.0122085	0.0366256	0	0.0366256
				Unidentified	0.146502	0.390673	0.0732511	0.0976682	0.0488341	0.0854597	0.122085	0.317422
		Planctomycetales	Planctomycetaceae	Planctomyces	0.024417	0.134294	0	0.0610426	0.0122085	0.024417	0.0488341	0.0732511
Proteobacteria	Alphaproteobacteria	Caulobacterales	Caulobacteraceae	Caulobacter	0	0.0122085	0	0	0	0	0	0
				Mycoplana	0.0122085	0.024417	0.0366256	0.451715	0.0366256	0.0854597	0.0122085	0.0488341
				Phenylobacterium	0.231962	0.0366256	0.0610426	0.0366256	0.0488341	0.0366256	0.122085	0.0854597
				Unidentified	0.0610426	0.0366256	0.0122085	0.0366255	0.024417	0.0610426	0.0366255	0.0122085
		Ellin329	Unidentified		0.305213	0.268587	0.024417	0.024417	0	0.0366256	0.0610426	0.122085
		Rhizobiales	Beijerinckiaceae	Unidentified	0.903431	1.18423	0.341839	0.500549	0.231962	0.427298	0.524966	0.622635
			Bradyrhizobiaceae	Balneimonas	3.58931	3.46722	3.25968	3.0033	3.43059	3.99219	2.52716	1.75803
				Bradyrhizobium	0.390673	0.268587	0.0854597	0.170919	0.0732511	0.183128	0.293005	0.195336
				Unidentified	0.402881	0.488341	0.268587	0.378464	0.109877	0.158711	0.378464	0.32963
			Hyphomicrobiaceae	Devosia	0.0976682	0.0610426	0.0366256	0.0366256	0.0732511	0.0854597	0.0610426	0.0610426
				Hyphomicrobium	0.0366256	0.0610426	0.0122085	0.024417	0.024417	0.024417	0.0122085	0.0488341
				Rhodoplanes	1.06214	1.59932	0.268588	0.573801	0.073251	0.41509	0.683677	0.622635
				Unidentified	0.402881	0.24417	0.0976682	0.170919	0.024417	0.170919	0.170919	0.341839
			Methylocystaceae	Unidentified	0.0854596	0.0976682	0.0366255	0.146502	0.0122085	0.0488341	0.305213	0.439507
			Phyllobacteriaceae	Mesorhizobium	0.207545	0.122085	0.195336	0.390673	0.0488341	0.24417	0.134294	0.122085
				Phyllobacterium	0.024417	0	0.0366256	0.0732511	0	0.024417	0.0122085	0
			Rhizobiaceae	Agrobacterium	0.158711	0.195336	0.219753	0.647052	0.122085	0.476132	0.0610426	0.0854597
				Sinorhizobium	0.378464	0.341839	1.8679	3.47943	0.732511	1.51386	0.24417	0.195336
				Unidentified	0.0122085	0.024417	0.0488341	0.0366256	0.024417	0.0488341	0.024417	0
			Rhodobiaceae	Afifella	0.0854597	0.195336	0.024417	0.109877	0	0.0366256	0.109877	0.0610426
			Xanthobacteraceae	Labrys	0.219753	0.170919	0.0854597	0.122085	0.0976682	0.0854597	0.122085	0.146502
				Unidentified	0.0366256	0.024417	0.0610426	0.231962	0.0366256	0.146502	0.341839	0.512758
			Unidentified		1.09877	1.36735	0.439507	0.830179	0.219753	0.647052	0.854597	0.952265
		Rhodobacterales	Hyphomonadaceae	Unidentified	0.0488341	0.0122085	0.0122085	0	0	0	0.0122085	0.024417
			Rhodobacteraceae	Rubellimicrobium	0.463924	0.390673	0.122085	0.24417	0.0488341	0.158711	0.207545	0.231962
		Rhodospirillales	Acetobacteraceae	Roseomonas	0	0	0.024417	0	0	0.024417	0	0.0122085
				Unidentified	0.268587	0.354047	0.305213	0.402881	0.0854597	0.32963	0.24417	0.183128
			Rhodospirillaceae	Azospirillum	0.0366256	0.0122085	0.0366256	0.024417	0.061043	0.061043	0.183128	0.109877
				Skermanella	3.88231	4.2974	2.62483	2.58821	1.13539	2.50275	3.74802	5.2985
				Unidentified	1.55048	1.48944	0.512758	0.756928	0.341839	0.439507	0.903431	0.927848
			Unidentified		0.561592	0.720303	0.231962	0.231962	0.219753	0.0488341	0.317422	0.586009
		Sphingomonadales	Erythrobacteraceae	Unidentified	0.41509	0.341839	0.0488341	0.109877	0.0122085	0.0732511	0.231962	0.219753
			Sphingomonadaceae	Kaistobacter	12.2818	8.91222	3.99219	8.55817	4.02881	7.27628	10.1819	6.27518
				Novosphingobium	0.0366256	0.0732511	0.024417	0	0.0122085	0.0122085	0.0610426	0.0976682
				Sphingomonas	0.305213	0.231962	0.183128	0.231962	0.158711	0.158711	0.170919	0.122085
				Unidentified	4.63924	1.88011	1.53827	2.02661	2.06324	2.38066	3.78464	1.66036
			Unidentified		0.231962	0.268587	0.0366256	0.158711	0.0122085	0.122085	0.158711	0.170919
	Betaproteobacteria	Burkholderiales	Comamonadaceae	Methylibium	0.0854597	0.0732511	0.0122085	0.0488341	0	0	0.0732511	0.158711
				Ramlibacter	0.0610426	0	0.0122085	0	0.0732511	0.0488341	0.0366256	0.0366256
				Variovorax	0.0122085	0	0.0610426	0.195336	0.0122085	0	0	0
				Unidentified	0.695886	0.769137	0.268587	0.402881	0.195336	0.439507	0.854597	0.720303
			Oxalobacteraceae	Cupriavidus	0.024417	0	0.146502	0.32963	0.024417	0.0976682	0	0.0122085
				Oxalobacter	0	0	0	0	0	0	0.183128	0.586009
				Ralstonia	0.0122085	0.0122085	0	0	0.0122085	0	0	0
				Unidentified	0.219753	0.0854596	0.0976682	0.024417	0.146502	0.024417	10.0354	6.31181
			Unidentified		0.537175	0.41509	0.366256	0.146502	0.610426	0.390673	18.2029	18.5814
		Ellin6067	Unidentified		0.158711	0.146502	0.024417	0.0610426	0.024417	0.0488341	0.024417	0.0854597
		MND1	Unidentified		0.439507	0.402881	0.0854597	0.183128	0.0366256	0.170919	0.146502	0.134294
		Nitrosomonadales	Nitrosomonadaceae	Unidentified	0.0366256	0.0610426	0	0	0	0	0.0122085	0.0366256
		SC-I-84	Unidentified		0.183128	0.122085	0.0366256	0.0976682	0.024417	0.0366256	0.0732511	0.0610426
		Unidentified			0.634843	0.964473	0.219753	0.231962	0.0732511	0.158711	1.40398	1.53827
	Deltaproteobacteria	Myxococcales	Cystobacteraceae	Cystobacter	0	0.0122085	0	0	0	0	0.024417	0
			Haliangiaceae	Unidentified	0.32963	1.08656	0.0366256	0.207545	0.024417	0.32963	0.280796	1.31852
			Myxococcaceae	Anaeromyxobacter	0.134294	0.0610426	0.024417	0.32963	0.0976682	0.65926	0.427298	0.512758
				Myxococcus	0	0.0122085	0	0	0.0122085	0	0	0.0122085
				Unidentified	0.024417	0.0122085	0.0122085	0.024417	0	0	0	0.024417
			Nannocystaceae	Nannocystis	0	0.0122085	0.0122085	0	0	0	0.0122085	0.0122085
			OM27	Unidentified	0	0	0	0	0.0122085	0	0	0.0122085
			Polyangiaceae	Sorangium	0.0732511	0.0732511	0	0.0122085	0	0	0	0.0122085
			Unidentified		0.732511	2.13649	0.305213	0.671469	0.207545	0.647052	0.451715	1.89232
		Syntrophobacterales	Syntrophobacteraceae	Unidentified	0.866805	1.30631	0.451715	0.366256	0.134294	0.293005	0.512758	0.500549
		[Entotheonellales]	[Entotheonellaceae]	Candidatus Entotheonella	0.170919	0.146502	0.0488341	0.0732511	0	0	0.024417	0.0732511
				Unidentified	0.573801	0.561592	0.195336	0.170919	0.0488341	0.122085	0.183128	0.305213
		Unidentified			0	0	0	0.0366256	0	0.0366256	0	0
	Gammaproteobacteria	Pseudomonadales	Pseudomonadaceae	Unidentified	0	0	3.77243	8.54597	4.78574	12.9654	0	0
		Xanthomonadales	Sinobacteraceae	Steroidobacter	0.927848	0.708094	0.305213	0.219753	0.256379	0.170919	0.402881	0.317422
				Unidentified	0.32963	0.366256	0.195336	0.109877	0.109877	0.109877	0.280796	0.219753
			Xanthomonadaceae	Lysobacter	1.41619	0.842388	1.47723	4.93224	1.08656	2.56379	0.781345	0.41509
				Thermomonas	0.08546	0.048834	0.036626	0.061043	0.024417	0.048834	0.061043	0.048834
				Unidentified	0.524966	0.488341	0.549384	0.854597	0.366256	0.537175	0.500549	0.354047
		Unidentified			0	0.0122085	0	0	0	0	0	0
	Unidentified				0	0	0	0	0	0	0	0.0122085
TM7	Unidentified				0.0122085	0	0	0.0122085	0	0	0.0122085	0.0122085
Verrucomicrobia	Opitutae	Opitutales	Opitutaceae	Opitutus	0.0976682	0.170919	0.0366256	0.0976682	0.0366256	0.0610426	0.0366256	0.109877
				Unidentified	0	0	0.0122085	0	0	0	0	0
	[Pedosphaerae]	[Pedosphaerales]	Ellin517	Unidentified	0.109877	0.146502	0.024417	0.0122085	0.024417	0.0122085	0.0366256	0.109877
			Unidentified		0.0854597	0.122085	0.0976681	0.0732511	0.0122085	0.024417	0.0366255	0.0976682
	[Spartobacteria]	[Chthoniobacterales]	[Chthoniobacteraceae]	Unidentified	0.122085	0.170919	0.0122085	0.83018	0.024417	0.708094	0.146502	0.0854596
Unidentified					0.219754	0.634844	0.170918	0.146503	0.07325	0.0732505	0.134294	0.427299
